# Supplementary material for: The dual-defective SnS2 monolayers: promising 2D photocatalysts for overall water splitting
Source: Royal Society of Chemistry journal article supplement (doi:10.1039/c9cp04649f), 2019-01-01
Supplement: c9cp04649f1.pdf [file c9cp04649f1.pdf]

## Electronic Supplementary Information (ESI) for

### **The dual-defected SnS<sub>2</sub> monolayers: Promising 2D photocatalysts for overall water splitting**

Batjargal Sainbileg,<sup>ab</sup> Ying-Ren Lai,<sup>abc</sup> Li-Chyong Chen<sup>ab</sup> and Michitoshi Hayashi<sup>\*ab</sup>

<sup>a</sup>Center for Condensed Matter Sciences, National Taiwan University, Taipei 106, Taiwan

<sup>b</sup>Center of Atomic Initiative for New Materials, National Taiwan University, Taipei 106, Taiwan

<sup>c</sup>Department of Chemistry, National Taiwan University, Taipei 106, Taiwan

Corresponding Author E-mail: [atmyh@ntu.edu.tw](mailto:atmyh@ntu.edu.tw)

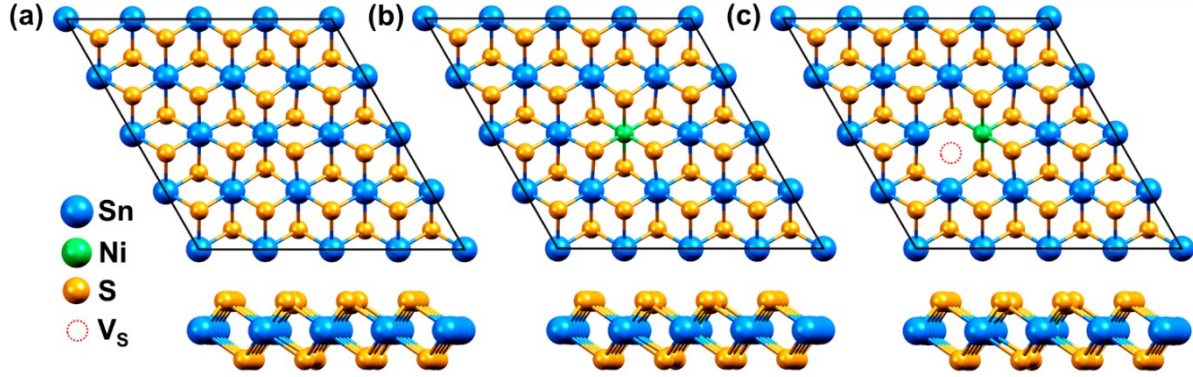

**Fig. S1.** Structure of (a) pristine  $\text{SnS}_2$ , (b) Nickel doped  $\text{SnS}_2$  ( $\text{Ni-SnS}_2$ ) and (c) Nickel doped  $\text{SnS}_2$  with sulfur monovacancy defect ( $\text{Ni-SnS}_2\text{-V}_\text{S}$ ). The black box illustrates the periodic supercell while the blue, yellow and green spheres represent the tin, sulfur and nickel atoms, respectively.

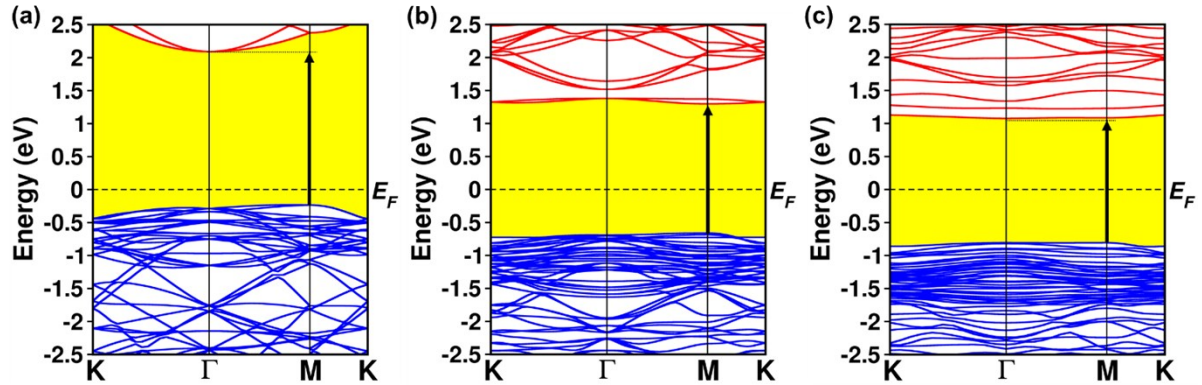

**Fig. S4.** Band structures of (a) pristine  $\text{SnS}_2$ , and defective (b)  $\text{Ni-SnS}_2$  and (c)  $\text{Ni-SnS}_2\text{-V}_\text{S}$ . The red and blue lines represent the conduction and valence bands, respectively, whereas the dashed line illustrates the Fermi level  $E_F$ . The band structure of  $\text{SnS}_2$  and  $\text{Ni-SnS}_2$  are adapted with permission from our recent work in the ref [1]. Copyright (2019) Chemical Physics.

**Table S1.** The formation energy of the investigated  $\text{SnS}_2$  monolayers relative to pure  $\text{SnS}_2$

| Monolayer structures                | Relative formation energy (eV) |
|-------------------------------------|--------------------------------|
| Pristine $\text{SnS}_2$             | 0                              |
| $\text{Ni-SnS}_2$                   | 1.10                           |
| $\text{Ni-SnS}_2\text{-V}_\text{S}$ | 1.96                           |

Note that all formation energy refers to the hereafter is relative formation energy compared with the pristine  $\text{SnS}_2$ .

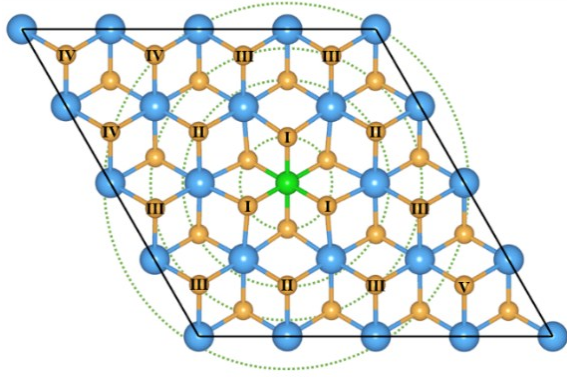

**Fig. S2.** Possible positions of sulfur monovacancy in the Ni-SnS<sub>2</sub> monolayers have been tested.

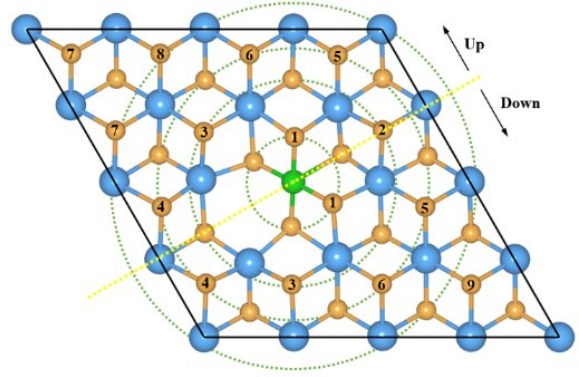

**Fig. S3.** Possible positions of two- and three-sulfur vacancies in the Ni-SnS<sub>2</sub>-V<sub>NS</sub> monolayers have been tested.

**Table S2.** The relative formation energy of the Ni-SnS<sub>2</sub>-V<sub>S</sub> monolayers with different positions of sulfur monovacancy regarding a nickel dopant

| The first S-vacancy location              | Distance (V <sub>S</sub> -Ni) (Å) | Formation energy (eV) |
|-------------------------------------------|-----------------------------------|-----------------------|
| Ni-SnS <sub>2</sub> -V <sub>S</sub> (I)   | 2.34                              | 1.96                  |
| Ni-SnS <sub>2</sub> -V <sub>S</sub> (II)  | 4.53                              | 2.74                  |
| Ni-SnS <sub>2</sub> -V <sub>S</sub> (III) | 5.82                              | 2.74                  |
| Ni-SnS <sub>2</sub> -V <sub>S</sub> (IV)  | 7.84                              | 2.67                  |
| Ni-SnS <sub>2</sub> -V <sub>S</sub> (V)   | 8.67                              | 3.12                  |

**Table S3.** The relative formation energy of the Ni-SnS<sub>2</sub>-V<sub>2S</sub> monolayers with different positions of two sulfur vacancies regarding a nickel dopant (see Fig. S3)

| The second S-vacancy location            | Distance (V <sub>S</sub> -Ni) (Å) | Formation energy (eV) |
|------------------------------------------|-----------------------------------|-----------------------|
| Ni-SnS <sub>2</sub> -V <sub>2S</sub> (1) | 2.26                              | 3.37                  |
| Ni-SnS <sub>2</sub> -V <sub>2S</sub> (2) | 4.49                              | 3.34                  |
| Ni-SnS <sub>2</sub> -V <sub>2S</sub> (3) | 4.49                              | 3.07                  |
| Ni-SnS <sub>2</sub> -V <sub>2S</sub> (4) | 5.71                              | 3.02                  |
| Ni-SnS <sub>2</sub> -V <sub>2S</sub> (5) | 5.73                              | 3.32                  |
| Ni-SnS <sub>2</sub> -V <sub>2S</sub> (6) | 5.78                              | 3.64                  |
| Ni-SnS <sub>2</sub> -V <sub>2S</sub> (7) | 7.79                              | 3.42                  |
| Ni-SnS <sub>2</sub> -V <sub>2S</sub> (8) | 7.80                              | 3.88                  |
| Ni-SnS <sub>2</sub> -V <sub>2S</sub> (9) | 8.61                              | 3.43                  |

**Table S4.** The relative formation energy of the Ni-SnS<sub>2</sub>-V<sub>3S</sub> monolayers with different positions of three sulfur vacancies regarding a nickel dopant (see Fig. S3)

| The second and third S-vacancy location                                | Formation energy (eV) |
|------------------------------------------------------------------------|-----------------------|
| Ni-SnS <sub>2</sub> -V <sub>3S</sub> (2,6)                             | 4.89                  |
| Ni-SnS <sub>2</sub> -V <sub>3S</sub> (3 <sup>d</sup> ,4 <sup>d</sup> ) | 4.14                  |
| Ni-SnS <sub>2</sub> -V <sub>3S</sub> (4 <sup>u</sup> ,4 <sup>d</sup> ) | 4.78                  |
| Ni-SnS <sub>2</sub> -V <sub>3S</sub> (3 <sup>u</sup> ,4 <sup>d</sup> ) | 4.24                  |
| Ni-SnS <sub>2</sub> -V <sub>3S</sub> (3 <sup>u</sup> ,3 <sup>d</sup> ) | 4.28                  |
| Ni-SnS <sub>2</sub> -V <sub>3S</sub> (2,4 <sup>d</sup> )               | 4.22                  |

Here, "u" and "d" are abbreviations of up and down (see Fig. S3).

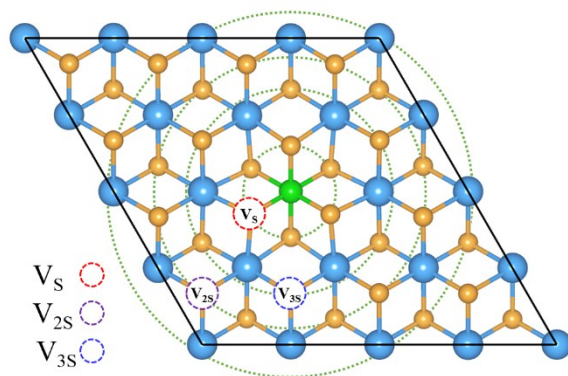

**Fig. S5.** Selected positions of the sulfur vacancies in the Ni-SnS<sub>2</sub>-V<sub>NS</sub> monolayer owing to more favorable formation energy.

**Table S5.** The relative formation energy of the more favorable configurations among the all tested Ni-SnS<sub>2</sub>-V<sub>NS</sub> monolayers

| Selected Ni-SnS <sub>2</sub> -V <sub>NS</sub> | Formation energy (eV) |
|-----------------------------------------------|-----------------------|
| Ni-SnS <sub>2</sub> -V <sub>S</sub>           | 1.96                  |
| Ni-SnS <sub>2</sub> -V <sub>2S</sub>          | 3.02                  |
| Ni-SnS <sub>2</sub> -V <sub>3S</sub>          | 4.14                  |

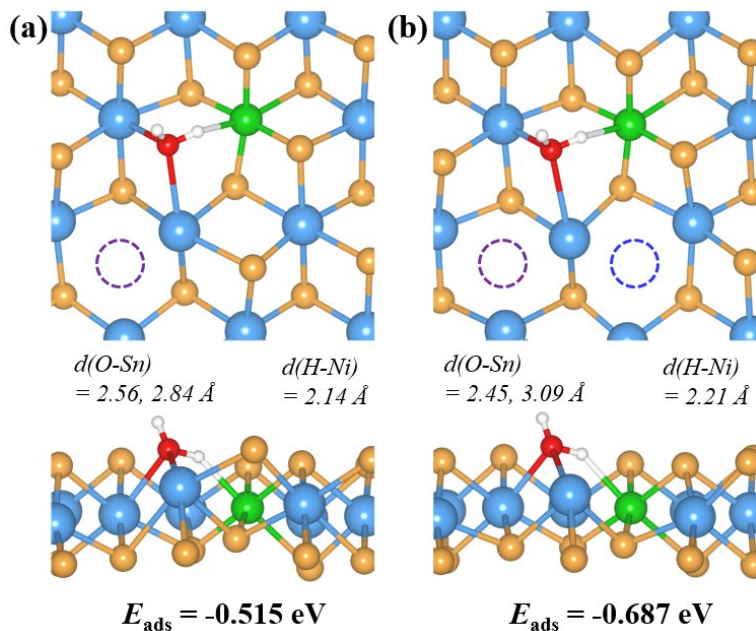

**Fig. S6.** Water adsorption on (a) Ni-SnS<sub>2</sub>-V<sub>2S</sub> and (b) Ni-SnS<sub>2</sub>-V<sub>3S</sub> monolayer. Note that the  $E_{ads}$  of H<sub>2</sub>O on the Ni-SnS<sub>2</sub>-V<sub>2S</sub> and Ni-SnS<sub>2</sub>-V<sub>3S</sub> are still high, showing chemisorption of an H<sub>2</sub>O molecule. However,  $E_{ads}$  values of the Ni-SnS<sub>2</sub>-V<sub>2S</sub> and Ni-SnS<sub>2</sub>-V<sub>3S</sub> are lower than -0.879 eV on Ni-SnS<sub>2</sub>-V<sub>S</sub>.

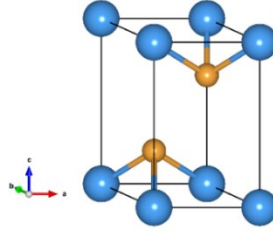

**Fig. S7.** The unit cell of bulk SnS<sub>2</sub>, being a 2H polytype, has the hexagonal structure with  $P-3m1$  symmetry (space group 164) and lattice constants of  $a = b = 3.65 \text{ \AA}$  and  $c = 5.89 \text{ \AA}$  [2], adopting as initial crystal structure. After optimization calculation with the DFT-D3 method, the optimized unit cell of SnS<sub>2</sub> had the lattice constants of  $a = b = 3.67 \text{ \AA}$ ,  $c = 5.90 \text{ \AA}$ ,  $\alpha = \beta = 90^\circ$ , and  $\gamma = 120^\circ$ , which are consistent with previous experimental results [3-5], whereas the optimized SnS<sub>2</sub> monolayer has the  $4 \times 4 \times 1$  supercell with lattice constants of  $a = b = 14.7 \text{ \AA}$  and  $c = 25.0 \text{ \AA}$ .

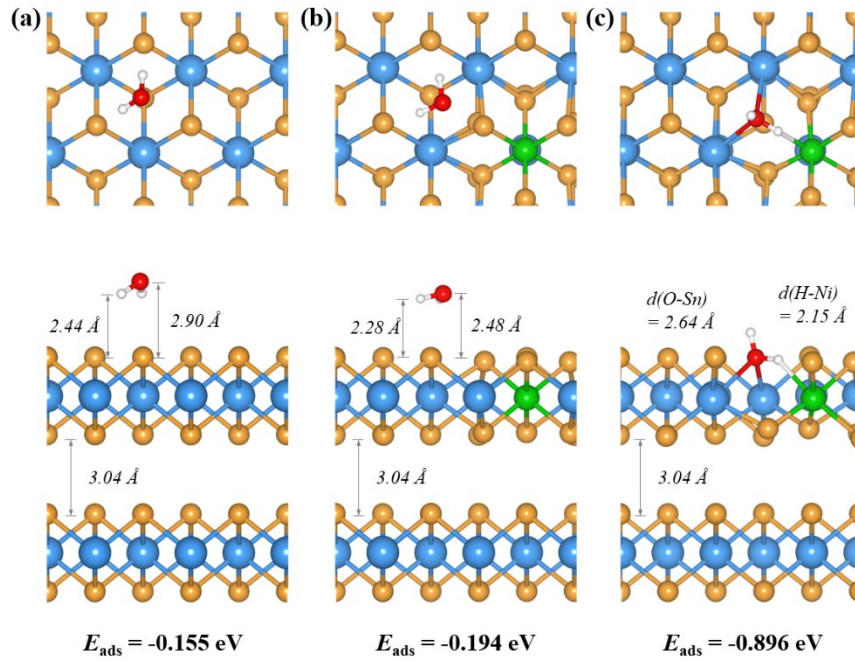

**Fig. S8.** Water adsorption on (a) SnS<sub>2</sub> (b) Ni-SnS<sub>2</sub> and (c) Ni-SnS<sub>2</sub>-V<sub>S</sub> bilayers.  $E_{\text{ads}}$  of an H<sub>2</sub>O on pristine SnS<sub>2</sub> and Ni-SnS<sub>2</sub> bilayers do not show an obvious discrepancy from that of their monolayers while the  $E_{\text{ads}}$  for dual-defected bilayer is increased by 0.017 eV only (see also Table S6).

**Table S6.** Comparison for  $E_{\text{ads}}$  of an H<sub>2</sub>O on mono- and bilayers of SnS<sub>2</sub>, Ni-SnS<sub>2</sub>, Ni-SnS<sub>2</sub>-V<sub>S</sub>

| SnS <sub>2</sub> structures         | $E_{\text{ads}}$ at monolayer (eV) | $E_{\text{ads}}$ at bilayer (eV) | Difference (eV) |
|-------------------------------------|------------------------------------|----------------------------------|-----------------|
| Pristine SnS <sub>2</sub>           | -0.154                             | -0.155                           | -0.001          |
| Ni-SnS <sub>2</sub>                 | -0.189                             | -0.194                           | -0.005          |
| Ni-SnS <sub>2</sub> -V <sub>S</sub> | -0.879                             | -0.896                           | -0.017          |

## The COHP and iCOHP of the most stable water adsorption configurations on pure SnS<sub>2</sub>, Ni-SnS<sub>2</sub> and Ni-SnS<sub>2</sub>-V<sub>S</sub> monolayers

To understand the interaction between the H<sub>2</sub>O molecule and surfaces, we have generated the COHP (crystal orbital Hamilton population) and iCOHP (integrated crystal orbital Hamilton population) values by using the LOBSTER program<sup>[3]</sup>. The COHP and iCOHP plots are presented in Fig. S9-S12 where the positive (negative) COHP values indicate bonding (antibonding) contributions between two selected atoms whereas the positive iCOHP values represents the net bonding contributions to the pair.

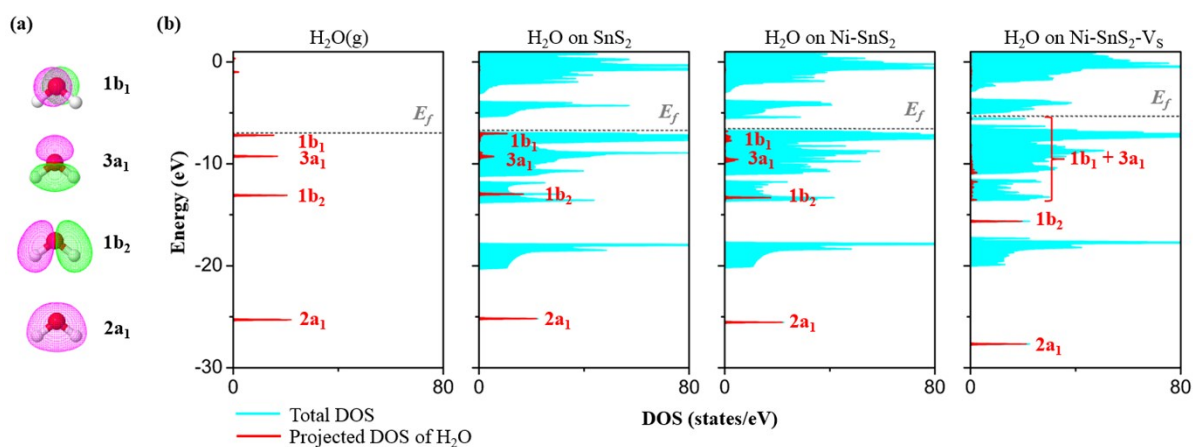

**Fig. S9.** (a) Occupied valence orbitals of the gas phase H<sub>2</sub>O molecule. (b) DOS plots for the H<sub>2</sub>O molecule absorption on SnS<sub>2</sub>, Ni-SnS<sub>2</sub> and Ni-SnS<sub>2</sub>-V<sub>S</sub> monolayers. For comparison, all energies are referred to as  $E_{(\text{vacuum-potential})} = 0$ . From these projected DOS of the H<sub>2</sub>O molecule, we can find that the H<sub>2</sub>O molecule interacted with these surfaces predominantly through the 1b<sub>1</sub> (lone pair) and 3a<sub>1</sub> orbitals. The stronger interaction between the H<sub>2</sub>O molecule and the Ni-SnS<sub>2</sub>-V<sub>S</sub> monolayer results in the much broadening of 1b<sub>1</sub> and 3a<sub>1</sub> peaks.

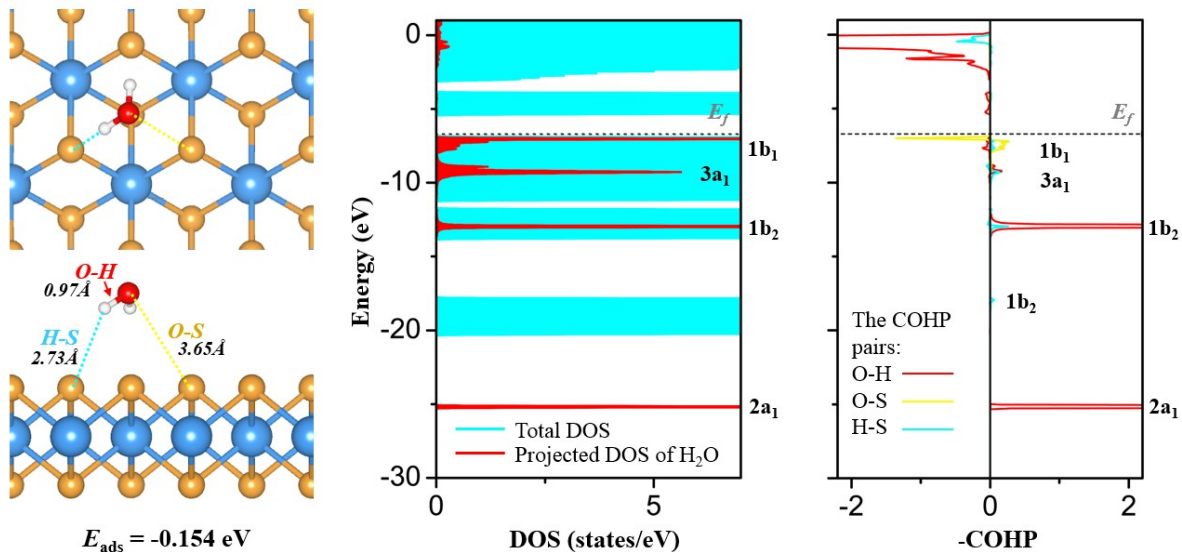

**Fig. S10.** The relevant bond distance, DOS and COHP plots of the most stable H<sub>2</sub>O molecule adsorption configuration on the pure SnS<sub>2</sub> monolayer. The iCOHP value for the O-H bond (indicated in the red arrow) is +7.262 and this is slightly weaker than the iCOHP value for the O-H bond of the gas phase H<sub>2</sub>O (+7.410 from our calculation). The iCOHP value for the O-S bond (indicated in the yellow dot line) is +0.015 and for the H-S (indicated in the blue dot line) bond is +0.107. These two interactions are weak and include bonding and antibonding interactions as shown in the COHP plot. Notably, the interactions between the O atom of the H<sub>2</sub>O molecule and the surface S atom are mainly due to the lone pair interactions, which include the similar magnitude of bonding and antibonding interactions and sum to a small iCOHP value.

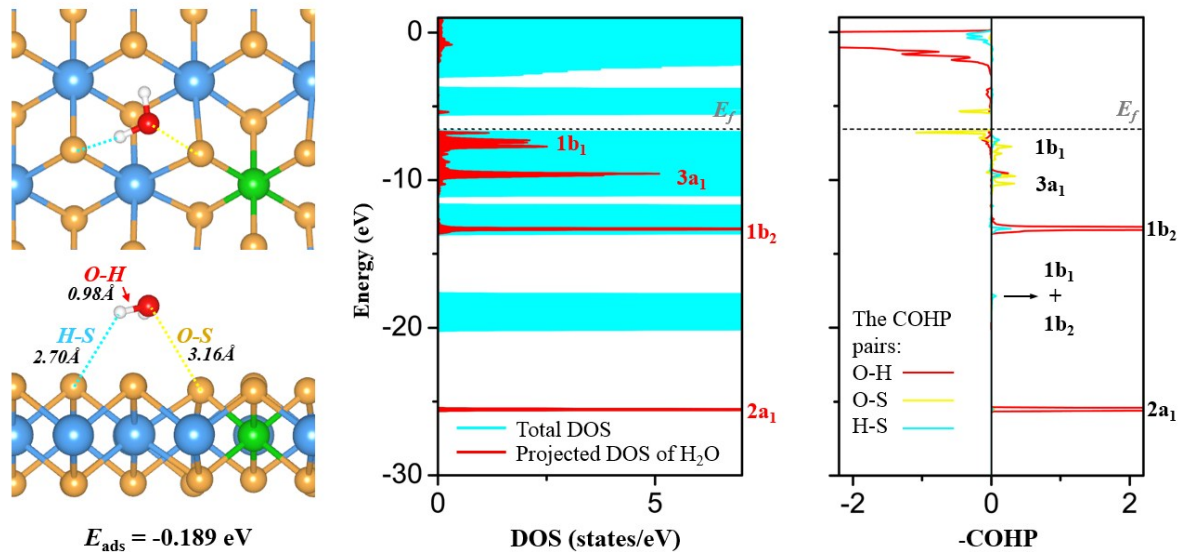

**Fig. S11.** The relevant bond distance, DOS and COHP plots of the most stable H<sub>2</sub>O molecule adsorption configuration on Ni-SnS<sub>2</sub> monolayer. The iCOHP value for the O-H bond (indicated in the red arrow) is +7.343 and this is slightly weaker than the iCOHP value for the O-H bond of the gas phase H<sub>2</sub>O (+7.410). The iCOHP value for the O-S bond (indicated in the yellow dot line) is +0.068 and for the H-S (indicated in the blue dot line) bond is +0.130. After Ni-doping, the lone pair repulsion between the 1b<sub>2</sub> molecular orbital of the H<sub>2</sub>O molecule and the *p*-orbitals of the surface S atom is slightly reduced and new bonding interactions are formed between the 1b<sub>2</sub> and 3a<sub>1</sub> orbitals of the H<sub>2</sub>O molecule and the *p*-orbitals of the surface S atom (near the range of -10 eV). The small increases of the iCOHP value of the O-S bond (about 0.053) and the H-S bond (about 0.023) match with the adsorption energy going from -0.154 eV to -0.189 eV with comparing to the results of the H<sub>2</sub>O molecule adsorption on the pure SnS<sub>2</sub> monolayer in **Fig. S10**.



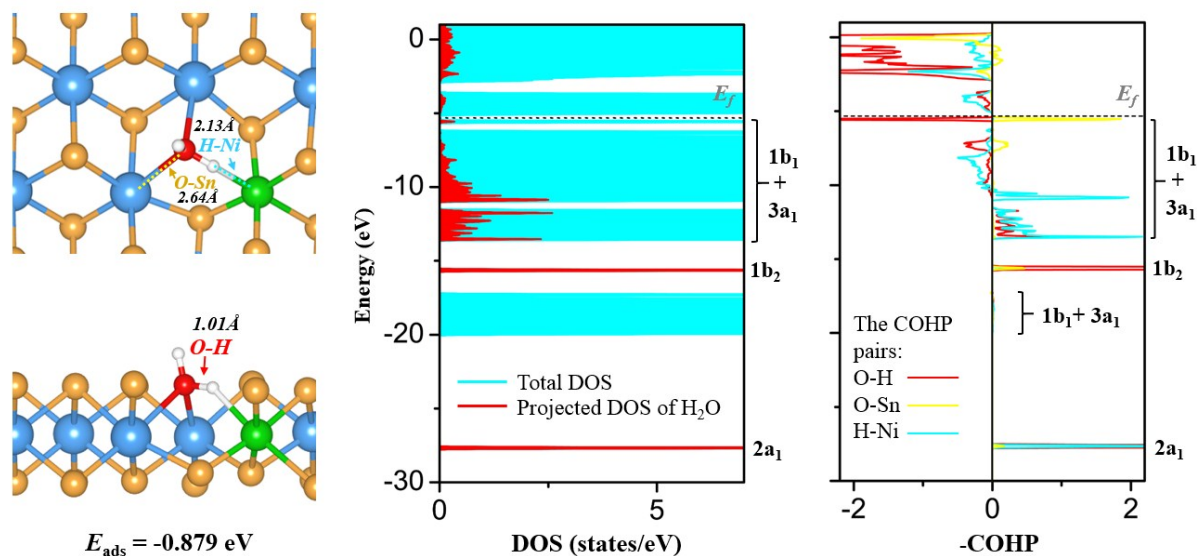

**Fig. S12.** The relevant bond distance, DOS and COHP plots of the most stable H<sub>2</sub>O molecule adsorption configuration on the Ni-SnS<sub>2</sub>-V<sub>5</sub> monolayer. For this water chemisorption result, the O-H bond near the surface lengthens from 0.97 to 1.01 Å (indicated in the red arrow) and the corresponding iCOHP value decreases from +7.410 to +6.979. The weakening of this O-H bond is reflected in the antibonding contributions in the COHP plot (red line). The iCOHP value for the O-Sn bond (indicated in the yellow dot line) is +1.016 and for the H-Ni (indicated in the blue dot line) bond is +0.430.

## REFERENCES

- [1] B. Sainbileg and M. Hayashi, *Chem. Phys.*, 2019, **522**, 59–64.
- [2] L. A. Burton, T. J. Whittles, D. Hesp, W. M. Linhart, J. M. Skelton, B. Hou, R. F. Webster, G. O’Dowd, C. Reece, D. Cherns, D. J. Fermin, T. D. Veal, V. R. Dhanak and A. Walsh, *J. Mater. Chem. A*, 2016, **4**, 1312–1318.
- [3] Y. Sun, H. Cheng, S. Gao, Z. Sun, Q. Liu, Q. Liu, F. Lei, T. Yao, J. He, S. Wei and Y. Xie, *Angew. Chem. Int. Ed.*, 2012, **51**, 8727–8731.
- [4] M. Ø. Filsø, E. Eikeland, J. Zhang, S. R. Madsen and B. B. Iversen, *Dalton Trans.*, 2016, **45**, 3798–3805.
- [5] S. K. Arora, D. H. Patel and M. K. Agarwal, *Cryst. Res. Technol.*, 1993, **28**, 623–627.
- [6] S. Maintz, V. L. Deringer, A. L. Tchougreeff and R. Dronskowski, *J. Comput. Chem.*, 2016, **37**, 1030–1035.
